# Supplementary material for: From particles to stabilizing blocks – polymerized ionic liquids in aqueous heterophase polymerization
Source: Royal Society of Chemistry journal article supplement (doi:10.1039/c4py00458b), 2014-01-01
Supplement: c4py00458b1.pdf [file c4py00458b1.pdf]

Electronic Supporting Information

“From Particles to Stabilizing Blocks – Polymerized Ionic Liquids in Aqueous Heterophase Polymerization”

Ran Yu, Klaus Tauer

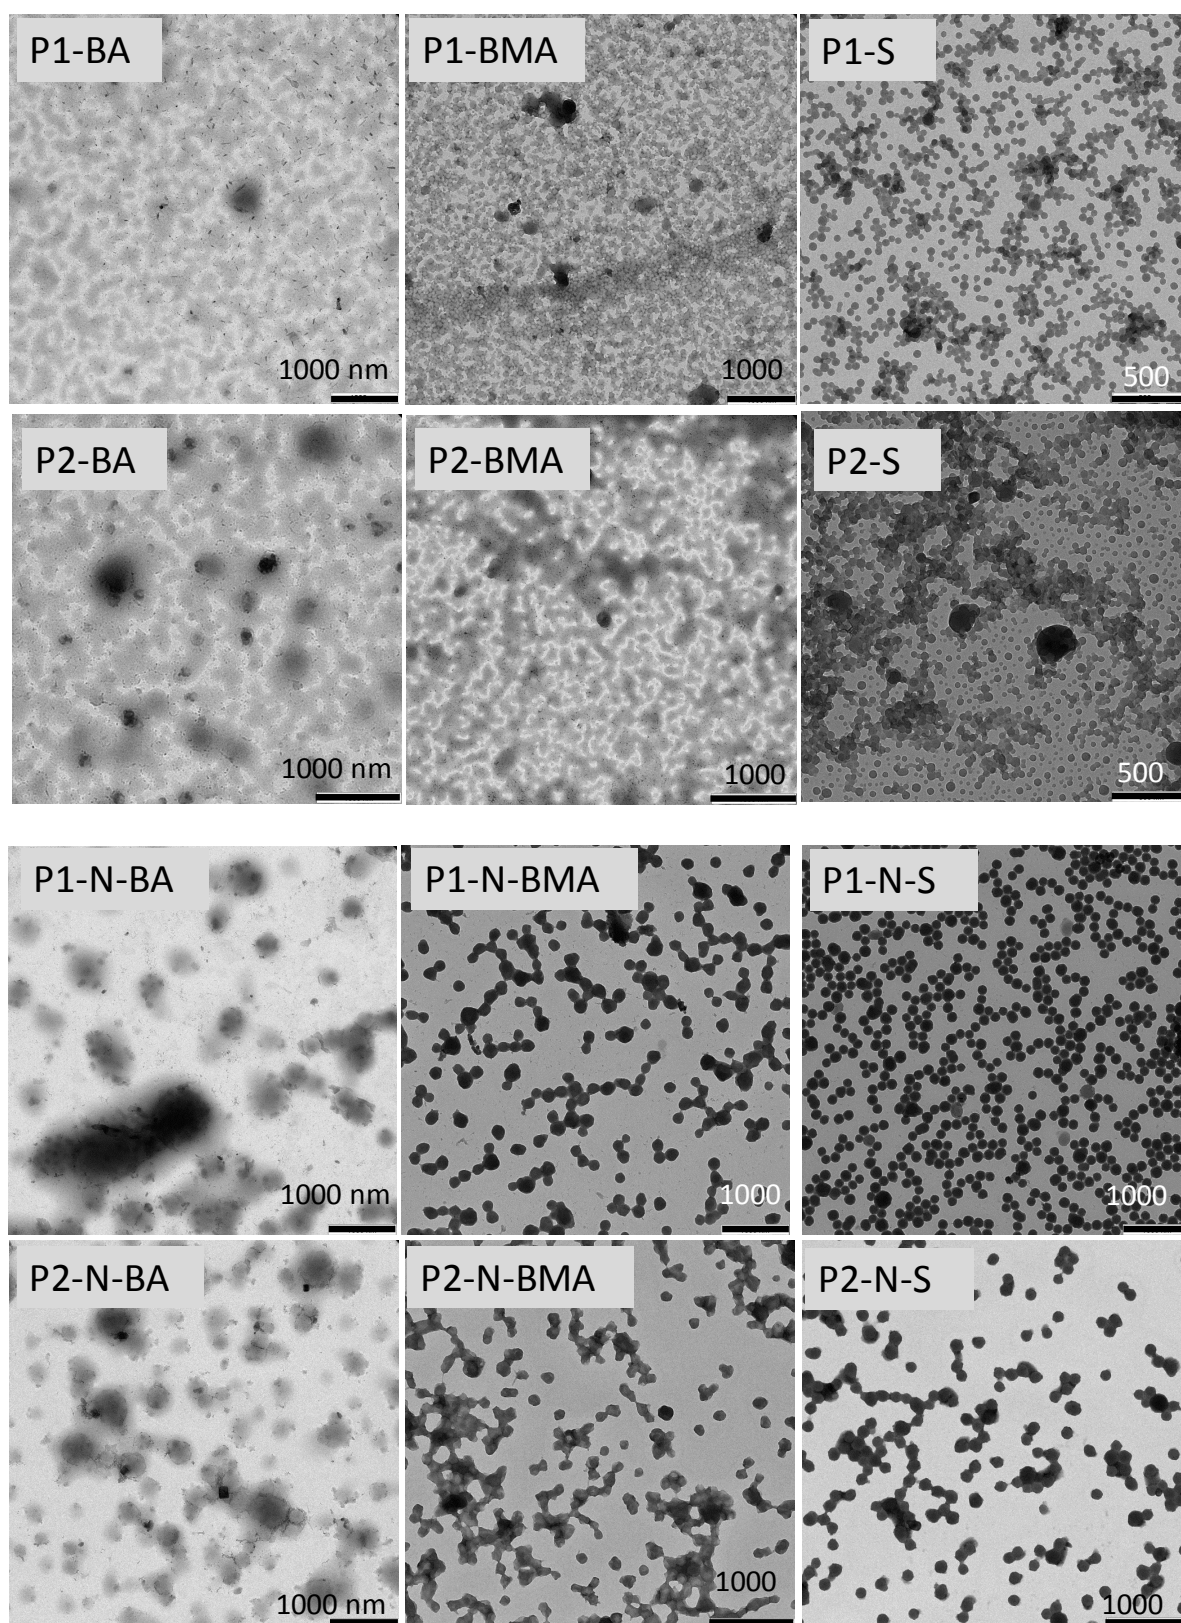

**Figure S1.** TEM micrographs of copolymers derived from two types of PIL, crosslinked PIL (P1) and non-crosslinked PIL (P2) showing the typical structures observed when the dispersions were dried on carbon coated copper grids.

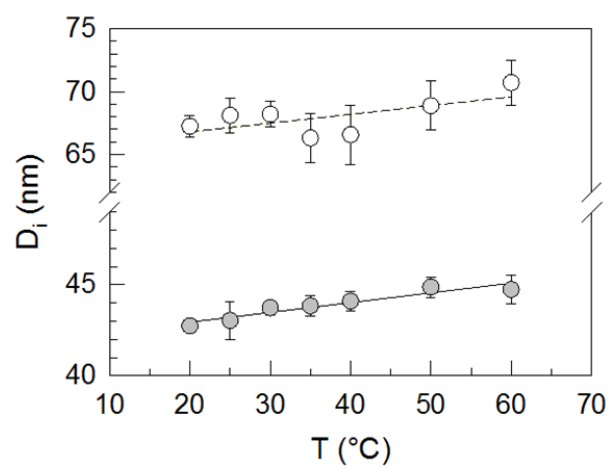

**Figure S2.** Correlation between the average hydrodynamic particle diameter ( $D_i$ ) and temperature for the PIL dispersions; white symbols P1, grey symbols P2.
